# Supplementary material for: Absence of fibromodulin affects matrix composition, collagen deposition and cell turnover in healthy and fibrotic lung parenchyma
Source: PubMed Central journal article supplement — Sci Rep. 2014 Sep 18;4:6383. doi: 10.1038/srep06383 (PMC5377322; doi:10.1038/srep06383), 2014-09-18
Supplement: srep06383-s1.pdf [file srep06383-s1.pdf]

Supplementary information to manuscript SREP-14-01527A “Absence of fibromodulin affects matrix composition, collagen deposition and cell turnover in healthy and fibrotic lung parenchyma”, by Kristina Rydell-Törmänen, Kristofer Andréasson, Roger Hesselstrand and Gunilla Westergren-Thorsson.

| Parameter                                 | WT control  | WT bleomycin               | FM control               | FM bleomycin                 |
|-------------------------------------------|-------------|----------------------------|--------------------------|------------------------------|
| Total collagen (fraction, %)              | 7.45±2.05   | 12.58±2.45 <sup>***</sup>  | 6.53±1.08                | 12.43±3.11 <sup>###</sup>    |
| Fibrillar collagen (fraction, %)          | 1.86±0.35   | 2.64±0.28 <sup>***</sup>   | 2.4±0.34 <sup>*</sup>    | 2.27±0.27 <sup>§</sup>       |
| Tissue density (fraction, %)              | 32.6±0.95   | 43.9±5.3 <sup>***</sup>    | 34.1±2.35                | 40.3±4.32 <sup>##</sup>      |
| TGF-β (pg/ml)                             | 92±8        | 108±15 <sup>*</sup>        | 99±13                    | 100±16                       |
| Collagen I (fraction, %)                  | 0.18±0.07   | 0.61±0.21 <sup>***</sup>   | 0.07±0.04 <sup>*</sup>   | 0.40±0.19 <sup>### §</sup>   |
| Collagen III (fraction, %)                | 5.49±0.91   | 4.64±0.80                  | 4.98±0.68                | 5.28±0.87                    |
| LOX (fraction, %)                         | 0.091±0.042 | 0.443±0.141 <sup>***</sup> | 0.182±0.093 <sup>*</sup> | 0.896±0.167 <sup>### §</sup> |
| Lumican (fraction, %)                     | 1.52±0.57   | 0.46±0.36 <sup>***</sup>   | 0.59±0.16 <sup>***</sup> | 0.68±0.25                    |
| Decorin (fraction, %)                     | 0.063±0.011 | 0.059±0.017                | 0.043±0.015 <sup>*</sup> | 0.043±0.016                  |
| Biglycan (fraction, %)                    | 0.14±0.04   | 0.47±0.07 <sup>***</sup>   | 0.21±0.04 <sup>*</sup>   | 0.54±0.05 <sup>###</sup>     |
| Proliferation (cells/mm <sup>2</sup> )    | 3.6±1.18    | 6.69±0.52                  | 7.80±0.82                | 10.09 ±2.31                  |
| Apoptosis (TUNEL, cells/mm <sup>2</sup> ) | 5.3±1.4     | 27.5±9.9                   | 8.5±2.1                  | 9.8±3.9                      |
| Cell numbers (cells/mm <sup>2</sup> )     | 3808±649    | 3674±414                   | 4106±568                 | 4502±724                     |
| Neutrophils (cells/mm <sup>2</sup> )      | 379±107     | 510±109 <sup>*</sup>       | 480±42                   | 534±55                       |
| Macrophages (cells/mm <sup>2</sup> )      | 75±19       | 63±10                      | 63±11                    | 104±16 <sup>### \$\$\$</sup> |
| MCP-1 (ELISA, pg/ml)                      | 108±18      | 77±27 <sup>*</sup>         | 65±15 <sup>*</sup>       | 79±29                        |

<sup>\*</sup>, <sup>\*\*</sup>, <sup>\*\*\*</sup> Denotes difference towards WT control, <sup>§</sup>, <sup>§§</sup>, <sup>§§§</sup> denotes difference towards WT bleomycin and <sup>#</sup>, <sup>##</sup>, <sup>###</sup> denotes difference towards FM control.

Abbreviations; LOX; Lysyl Oxidase, TUNEL; Terminal Uridine Nick-End Labelling, MCP-1; Monocyte Chemotactic Protein- 1 (aka CCL2 and JE).
